# Supplementary material for: Enrichment of Clinically Relevant Organisms in Spontaneous Preterm-Delivered Placentas and Reagent Contamination across All Clinical Groups in a Large Pregnancy Cohort in the United Kingdom
Source: PubMed Central journal article supplement (PMC6029081; doi:10.1128/aem.00483-18), 2018-07-02
Supplement: AEM.00483-18_zam014188604s1.pdf [file AEM.00483-18_zam014188604s1.pdf]

**Supplementary Data for manuscript: Enrichment of clinically relevant and novel organisms  
in spontaneous preterm delivered placenta in a large UK cohort**

Lydia J LEON, PhD; Ronan DOYLE, PhD; Mr Ernest DIEZ-BENAVENTE, MSc; Taane G CLARK,  
DPhil; Nigel KLEIN, PhD; Philip STANIER, PhD; Gudrun E MOORE, PhD

**Supplementary Table S1 – List of potential contaminating genera present in extraction reagents.** Contaminants defined as any OTUs with at least two reads in at least two of negative extraction samples.

| Genus            | N OTUs in negative extractions | Listed in A. Glassing et al. (1) |
|------------------|--------------------------------|----------------------------------|
| Acidovorax       | 2                              | Yes                              |
| Acinetobacter    | 25                             | Yes                              |
| Aeromonas        | 1                              | No                               |
| Afipia           | 1                              | Yes                              |
| Arabidopsis      | 2                              | No                               |
| Aureimonas       | 1                              | No                               |
| Bacillus         | 1                              | Yes                              |
| Brevibacterium   | 3                              | Yes                              |
| Chryseobacterium | 1                              | Yes                              |
| Cloacibacterium  | 1                              | Yes                              |
| Corynebacterium  | 4                              | Yes                              |
| Delftia          | 2                              | Yes                              |
| Dermacoccus      | 1                              | No                               |
| Enhydrobacter    | 3                              | Yes                              |
| Enterococcus     | 1                              | Yes                              |
| Escherichia      | 6                              | Yes                              |
| Finegoldia       | 1                              | No                               |
| Granulicatella   | 1                              | Yes                              |
| Haemophilus      | 1                              | Yes                              |

|                    |    |     |
|--------------------|----|-----|
| Hymenobacter       | 2  | No  |
| Janibacter         | 1  | Yes |
| Klebsiella         | 1  | Yes |
| Kocuria            | 7  | Yes |
| Lactobacillus      | 2  | Yes |
| Lactococcus        | 1  | No  |
| Massilia           | 6  | Yes |
| Micrococcus        | 1  | Yes |
| Mycoplana          | 1  | No  |
| Mycoplasma         | 1  | No  |
| Neisseria          | 2  | Yes |
| Paracoccus         | 1  | Yes |
| Peptoniphilus      | 1  | Yes |
| Peptostreptococcus | 1  | No  |
| Polynucleobacter   | 1  | No  |
| Propionibacterium  | 6  | Yes |
| Pseudomonas        | 4  | Yes |
| Ralstonia          | 2  | Yes |
| Rheinheimera       | 1  | No  |
| Rothia             | 3  | Yes |
| Sphingomonas       | 3  | Yes |
| Staphylococcus     | 15 | Yes |
| Streptococcus      | 7  | Yes |

|             |   |     |
|-------------|---|-----|
| Unassigned  | 4 | -   |
| Variovorax  | 2 | Yes |
| Veillonella | 1 | Yes |

---

**Supplementary Table S2– Genera enriched in sPTB vs nsPTB placenta with P<0.01 using an unadjusted Limma model (N=261).**

| Genus                 | Log2 fold change (95% CI) | P        | Q        |
|-----------------------|---------------------------|----------|----------|
| <i>Ureaplasma</i>     | 3.03 (1.57-4.5)           | 6.37E-05 | 1.60E-02 |
| <i>Prevotella</i>     | 2.32 (0.85-3.8)           | 2.20E-03 | 2.00E-01 |
| <i>Salinicoccus</i>   | 0.51 (0.18-0.84)          | 2.38E-03 | 2.00E-01 |
| <i>Mycoplasma</i>     | 1.61 (0.51-2.71)          | 4.19E-03 | 2.26E-01 |
| <i>Capnocytophaga</i> | 0.8 (0.24-1.36)           | 5.25E-03 | 2.26E-01 |
| <i>Anaerococcus</i>   | 1.8 (0.49-3.11)           | 7.29E-03 | 2.63E-01 |

**Supplementary Table S3 – Genera enriched in sPTB vs term placenta with P<0.01 using an unadjusted Limma model (N=261).**

| Genus                 | Log2 fold change (95% CI) | P        | Q        |
|-----------------------|---------------------------|----------|----------|
| <i>Tepidimonas</i>    | 2.49 (1.14-3.83)          | 3.31E-04 | 2.44E-02 |
| <i>Salinicoccus</i>   | 0.51 (0.23-0.79)          | 3.52E-04 | 2.44E-02 |
| <i>Capnocytophaga</i> | 0.88 (0.4-1.35)           | 3.53E-04 | 2.44E-02 |
| <i>Mycoplasma</i>     | 1.7 (0.77-2.63)           | 3.88E-04 | 2.44E-02 |
| <i>Anaerococcus</i>   | 1.71 (0.6-2.81)           | 2.69E-03 | 1.26E-01 |
| <i>Truepera</i>       | 0.3 (0.08-0.52)           | 9.04E-03 | 2.90E-01 |
| <i>Coprobacillus</i>  | 0.19 (0.05-0.33)          | 9.34E-03 | 2.90E-01 |

**Supplementary Table S4 – OTUs enriched in sPTB vs nsPTB placenta when compared using a Limma multi-level regression model with P<0.01, adjusted for delivery method, recruiting hospital, maternal ethnicity, BMI, and smoking behavior, and tissue type.**

| Genus                 | Log2 fold change (95% CI) | P        | Q        |
|-----------------------|---------------------------|----------|----------|
| <i>Actinobaculum</i>  | 0.63 (0.20-1.06)          | 4.36E-03 | 3.79E-01 |
| <i>Capnocytophaga</i> | 0.68 (0.20-1.17)          | 5.89E-03 | 3.79E-01 |
| <i>Fusobacterium</i>  | 0.30 (0.10-0.51)          | 3.80E-03 | 3.79E-01 |
| <i>Hydrogenophaga</i> | 0.36 (0.09-0.63)          | 8.82E-03 | 4.31E-01 |
| <i>Mogibacterium</i>  | 0.72 (0.19-1.24)          | 7.37E-03 | 4.09E-01 |
| <i>Mycoplasma</i>     | 0.94 (0.39-1.50)          | 8.67E-04 | 3.08E-01 |
| <i>Mycoplasma</i>     | 0.71 (0.29-1.13)          | 1.02E-03 | 3.08E-01 |
| <i>Mycoplasma</i>     | 1.14 (0.45-1.83)          | 1.26E-03 | 3.08E-01 |
| <i>Mycoplasma</i>     | 0.35 (0.13-0.57)          | 2.10E-03 | 3.79E-01 |
| <i>Mycoplasma</i>     | 1.50 (0.54-2.46)          | 2.39E-03 | 3.79E-01 |
| <i>Mycoplasma</i>     | 0.76 (0.24-1.28)          | 4.70E-03 | 3.79E-01 |
| <i>Mycoplasma</i>     | 0.48 (0.15-0.82)          | 5.23E-03 | 3.79E-01 |
| <i>Mycoplasma</i>     | 0.47 (0.14-0.80)          | 5.31E-03 | 3.79E-01 |
| <i>Mycoplasma</i>     | 0.26 (0.08-0.44)          | 5.60E-03 | 3.79E-01 |
| <i>Peptoniphilus</i>  | 0.47 (0.17-0.78)          | 2.50E-03 | 3.79E-01 |
| <i>Peptoniphilus</i>  | 0.66 (0.21-1.11)          | 4.47E-03 | 3.79E-01 |
| <i>Prevotella</i>     | 0.62 (0.16-1.07)          | 7.85E-03 | 4.17E-01 |
| <i>Salinicoccus</i>   | 0.49 (0.13-0.85)          | 8.38E-03 | 4.27E-01 |
| <i>Selenomonas</i>    | 0.54 (0.16-0.91)          | 5.24E-03 | 3.79E-01 |

|                      |                  |          |          |
|----------------------|------------------|----------|----------|
| <i>Streptococcus</i> | 0.60 (0.17-1.03) | 6.37E-03 | 3.89E-01 |
| <i>Ureaplasma</i>    | 3.54 (1.93-5.15) | 2.26E-05 | 2.76E-02 |

---

**Supplementary Table S5 – OTUs enriched in sPTB vs term placenta when compared using a Limma multi-level regression model with P<0.01, adjusted for delivery method, recruiting hospital, maternal ethnicity, BMI, and smoking behavior, and tissue type.**

| Genus                  | Log2 fold change (95% CI) | P        | Q        |
|------------------------|---------------------------|----------|----------|
| <i>Actinobaculum</i>   | 0.48 (0.14-0.82)          | 6.33E-03 | 2.46E-01 |
| <i>Alloiococcus</i>    | 0.78 (0.41-1.16)          | 4.60E-05 | 3.88E-02 |
| <i>Anaerococcus</i>    | 0.34 (0.09-0.6)           | 7.65E-03 | 2.46E-01 |
| <i>Bacteroides</i>     | 0.20 (0.06-0.34)          | 5.33E-03 | 2.42E-01 |
| <i>Bacteroides</i>     | 0.21 (0.06-0.37)          | 7.16E-03 | 2.46E-01 |
| <i>Blautia</i>         | 0.42 (0.20-0.64)          | 2.63E-04 | 1.07E-01 |
| <i>Capnocytophaga</i>  | 0.80 (0.41-1.18)          | 6.36E-05 | 3.88E-02 |
| <i>Capnocytophaga</i>  | 0.34 (0.12-0.55)          | 2.42E-03 | 1.59E-01 |
| <i>Capnocytophaga</i>  | 0.36 (0.13-0.59)          | 2.47E-03 | 1.59E-01 |
| <i>Coprobacillus</i>   | 0.22 (0.07-0.38)          | 4.38E-03 | 2.33E-01 |
| <i>Corynebacterium</i> | 0.27 (0.07-0.47)          | 8.66E-03 | 2.46E-01 |
| <i>Erwinia</i>         | 0.44 (0.17-0.71)          | 1.47E-03 | 1.26E-01 |
| <i>Fusobacterium</i>   | 0.22 (0.05-0.38)          | 9.80E-03 | 2.46E-01 |
| <i>Haemophilus</i>     | 0.63 (0.16-1.10)          | 8.73E-03 | 2.46E-01 |
| <i>Legionella</i>      | 0.33 (0.13-0.54)          | 1.74E-03 | 1.26E-01 |
| <i>Mycoplasma</i>      | 0.97 (0.42-1.52)          | 5.92E-04 | 1.26E-01 |
| <i>Mycoplasma</i>      | 1.24 (0.47-2.00)          | 1.61E-03 | 1.26E-01 |
| <i>Mycoplasma</i>      | 0.67 (0.26-1.09)          | 1.62E-03 | 1.26E-01 |
| <i>Mycoplasma</i>      | 0.27 (0.09-0.44)          | 2.73E-03 | 1.67E-01 |



---

|                        |                  |          |          |
|------------------------|------------------|----------|----------|
| <i>Mycoplasma</i>      | 0.63 (0.19-1.07) | 4.92E-03 | 2.40E-01 |
| <i>Mycoplasma</i>      | 0.37 (0.10-0.63) | 6.47E-03 | 2.46E-01 |
| <i>Mycoplasma</i>      | 0.36 (0.10-0.63) | 8.07E-03 | 2.46E-01 |
| <i>Mycoplasma</i>      | 0.44 (0.11-0.78) | 9.25E-03 | 2.46E-01 |
| <i>Mycoplasma</i>      | 0.19 (0.05-0.34) | 9.92E-03 | 2.46E-01 |
| <i>Oscillospira</i>    | 0.24 (0.08-0.41) | 4.29E-03 | 2.33E-01 |
| <i>Parabacteroides</i> | 0.16 (0.05-0.27) | 4.71E-03 | 2.40E-01 |
| <i>Salinicoccus</i>    | 0.50 (0.21-0.79) | 7.51E-04 | 1.26E-01 |
| <i>Sporobacterium</i>  | 0.18 (0.05-0.31) | 8.48E-03 | 2.46E-01 |
| <i>Streptococcus</i>   | 0.51 (0.21-0.80) | 8.79E-04 | 1.26E-01 |
| <i>Streptococcus</i>   | 0.99 (0.40-1.58) | 1.17E-03 | 1.26E-01 |
| <i>Streptococcus</i>   | 0.56 (0.22-0.9)  | 1.43E-03 | 1.26E-01 |
| <i>Streptococcus</i>   | 0.89 (0.34-1.43) | 1.56E-03 | 1.26E-01 |
| <i>Streptococcus</i>   | 0.45 (0.17-0.73) | 1.58E-03 | 1.26E-01 |
| <i>Streptococcus</i>   | 0.64 (0.24-1.04) | 1.76E-03 | 1.26E-01 |
| <i>Streptococcus</i>   | 0.92 (0.30-1.53) | 3.56E-03 | 2.07E-01 |
| <i>Streptococcus</i>   | 0.38 (0.11-0.65) | 5.35E-03 | 2.42E-01 |
| <i>Streptococcus</i>   | 0.52 (0.15-0.89) | 6.31E-03 | 2.46E-01 |
| <i>Streptococcus</i>   | 0.69 (0.19-1.2)  | 7.54E-03 | 2.46E-01 |
| <i>Streptococcus</i>   | 0.52 (0.14-0.9)  | 7.74E-03 | 2.46E-01 |
| <i>Streptococcus</i>   | 0.68 (0.18-1.19) | 8.09E-03 | 2.46E-01 |
| <i>Tepidimonas</i>     | 2 (0.59-3.41)    | 5.62E-03 | 2.45E-01 |
| <i>Turicibacter</i>    | 0.45 (0.11-0.79) | 9.06E-03 | 2.46E-01 |

---

---

|                     |                  |          |          |
|---------------------|------------------|----------|----------|
| <i>Wautersiella</i> | 0.32 (0.12-0.52) | 1.66E-03 | 1.26E-01 |
|---------------------|------------------|----------|----------|

---

**Supplementary Table S6 - R<sup>2</sup> values for comparisons of three diversity metrics between three groups of interest (sPTB, nsPTB, term) for adjusted and unadjusted models.**

| Beta diversity metric | R <sup>2</sup> (Unadjusted) | R <sup>2</sup> (Adjusted) |
|-----------------------|-----------------------------|---------------------------|
| Weighted UniFrac      | 0.018*                      | 0.022*                    |
| Unweighted UniFrac    | 0.014*                      | 0.016*                    |
| Bray-Curtis           | 0.018*                      | 0.022*                    |

\*P=0.001

### List of packages and versions used in statistical and bioinformatics analyses within R 3.4.3:

- cowplot\_0.9.2
- devtools\_1.13.4
- knitr\_1.19
- statmod\_1.4.30
- microbiome\_1.0.0
- limma\_3.34.6
- rafalib\_1.0.0
- genefilter\_1.60.0
- vegan\_2.4-6
- permute\_0.9-4
- ggplot2\_2.2.1
- DESeq2\_1.18.1
- Biobase\_2.38.0
- GenomicRanges\_1.30.0
- phyloseq\_1.22.3
- GenomeInfoDb\_1.14.0

### **REFERENCES**

1. Glassing A, Dowd SE, Galandiuk S, Davis B, Chiodini RJ. 2016. Inherent bacterial DNA contamination of extraction and sequencing reagents may affect interpretation of microbiota in low bacterial biomass samples. *Gut Pathogens* 8:24.
